# Supplementary material for: Reducing polyaromatic hydrocarbons: the capability and capacity of lithium
Source: Royal Society of Chemistry journal article supplement (doi:10.1039/c3ra47326k), 2014-01-01
Supplement: c3ra47326k1.pdf [file c3ra47326k1.pdf]

## Supporting Information

### Reducing the Polyaromatic Hydrocarbons: the Capability and Capacity of Lithium

Swati Panigrahi and G. Narahari Sastry\*

Centre for Molecular Modelling  
CSIR-Indian Institute of Chemical Technology, Tarnaka, Hyderabad-500607

| Contents                                                                                                                                                                                                                                                                     | Page No. |
|------------------------------------------------------------------------------------------------------------------------------------------------------------------------------------------------------------------------------------------------------------------------------|----------|
| <b>Supporting table I.</b> Binding energy (in kcal/mol) calculated by different quantum chemical levels for the PAH-Li complex systems.                                                                                                                                      | 2        |
| <b>Supporting figure I.</b> The total interaction energy (IE2) in kcal/mol of the B3LYP/6-31G(d) (a) T-Li (b) A-Li (c) N-Li complexes. The B.E and D.E are in kcal/mol, while the natural charges are in a.u.                                                                | 3        |
| <b>Supporting figure II .</b> All possible B3LYP/6-31G(d) optimized geometry of the mono, di, tri, tetra and penta lithium anthracene, naphthalene, and benzene complexes. Binding energy values are given in kcal/mol and the Li... ring centroid distances are given in Å. | 4        |

Supporting table I. Binding energy (in kcal/mol) calculated by different quantum chemical levels for the PAH-Li complex systems..

| Method                          | B-1A  | B-2C   | N-1A   | N-2A   | N-2C   | N-2D   | N-3C   | N-4C   |
|---------------------------------|-------|--------|--------|--------|--------|--------|--------|--------|
| <sup>a</sup> MP2/6-31G(d)       | -7.60 | -48.90 | -13.10 | -22.39 | -64.11 | -72.47 | -31.44 | -65.02 |
| <sup>a</sup> B3LYP/cc-pVTZ      | -1.84 | -48.03 | -23.13 | -42.54 | -63.93 | -73.67 | -65.61 | -42.71 |
| <sup>a</sup> M062X/cc-pVTZ      | -5.78 | -58.07 | -30.65 | -54.69 | -77.33 | -88.74 | -48.98 | -59.16 |
| <sup>a</sup> B3LYP/6-311++G(d)  | -1.68 | -47.61 | -23.00 | -42.15 | -63.58 | -73.11 | -64.88 | -41.73 |
| <sup>a</sup> B3LYP/aug-cc-pVDZ  | -1.30 | -46.32 | -22.19 | -40.73 | -62.29 | -71.61 | -63.31 | -39.83 |
| <sup>a</sup> B3PW91/6-31G(d)    | -3.48 | -47.20 | -21.73 | -44.37 | -63.77 | -74.23 | -67.70 | -44.77 |
| <sup>a</sup> MP2/cc-pVTZ        | -4.75 | -56.30 | -19.83 | -52.77 | -73.37 | -97.06 | -45.62 | -71.14 |
| <sup>a</sup> ωB97XD/6-31G(d)    | -5.64 | -49.95 | -23.40 | -41.92 | -68.52 | -80.57 | -73.97 | -43.71 |
| <sup>a</sup> B2PLYP/6-311++G(d) | -3.27 | -49.08 | -21.94 | -44.25 | -65.06 | -74.16 | -68.64 | -52.14 |
| <sup>b</sup> B3LYP/6-31G(d)     | -5.78 | -49.19 | -18.47 | -41.44 | -57.40 | -69.14 | -62.32 | -54.81 |

<sup>a</sup> Energy calculated on the MP2/6-31G(d) geometries

<sup>b</sup> Energy calculated on the B3LYP/6-31G(d) geometries

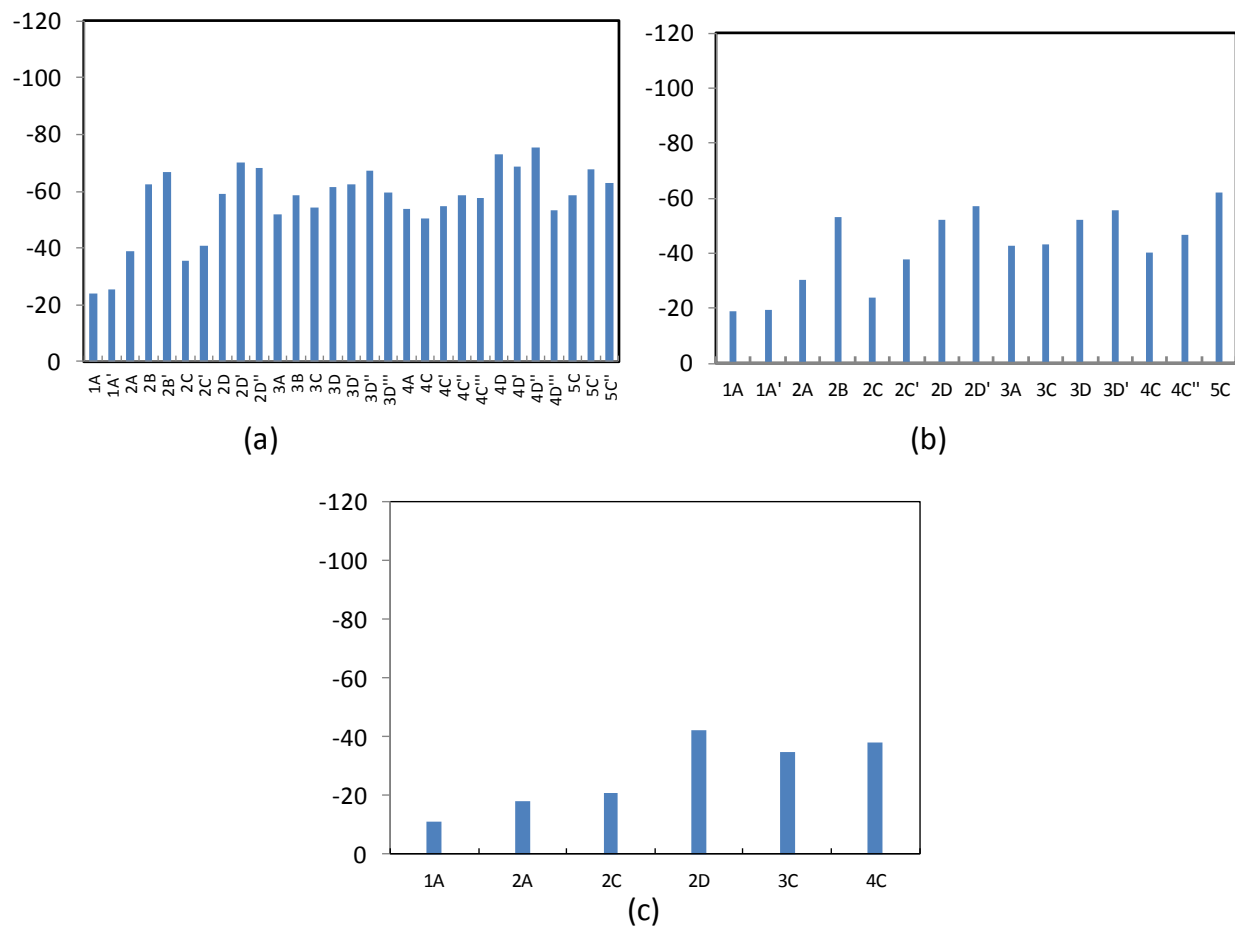

Supporting figure I. The total interaction energy (IE2) in kcal/mol of the B3LYP/6-31G(d) (a) T-Li (b) A-Li (c) N-Li complexes. The B.E and D.E are in kcal/mol, while the natural charges are in a.u.

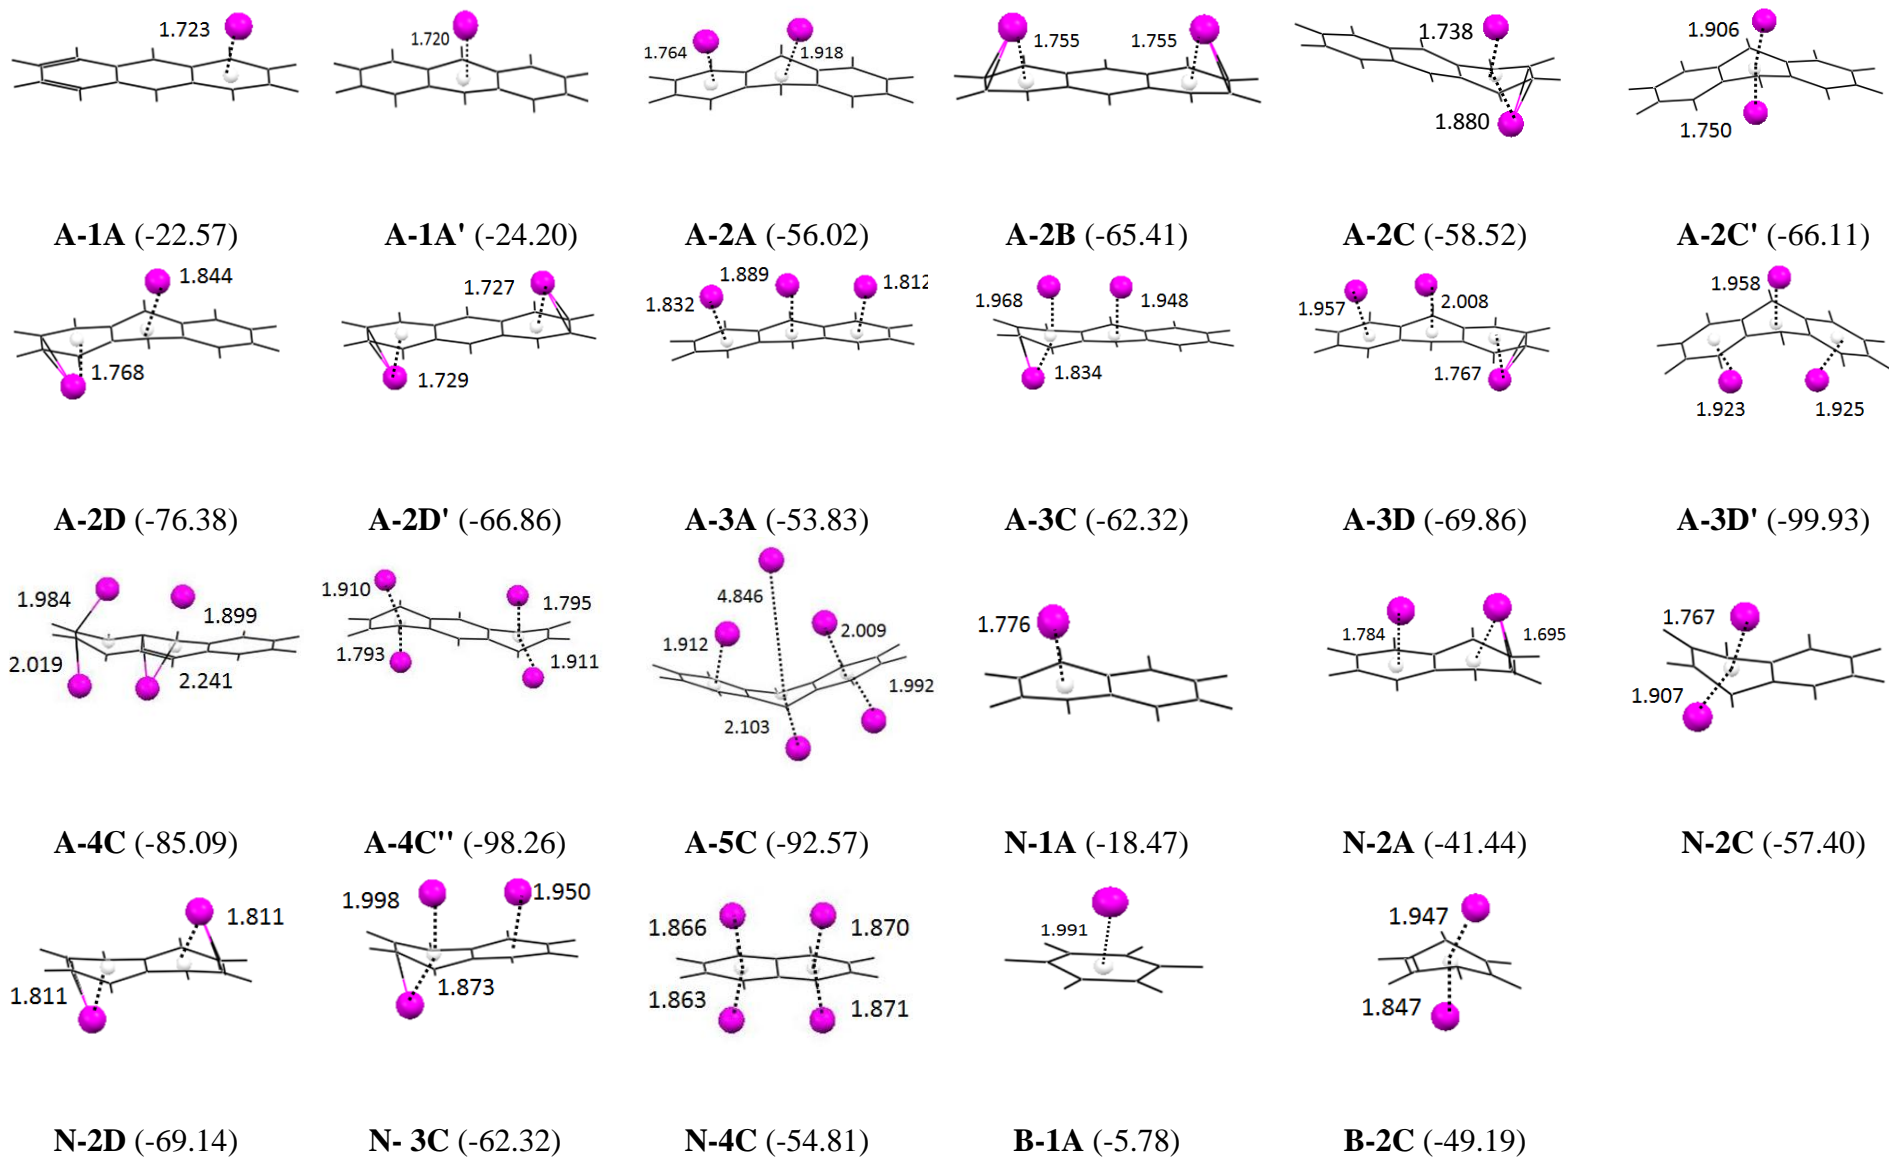

Supporting figure II. All possible B3LYP/6-31G(d) optimized geometry of the mono, di, tri, tetra and penta lithium anthracene, naphthalene, and benzene complexes. Binding energy values are given in kcal/mol and the Li... ring centroid distances are given in Å.
